# Supplementary material for: Single cell time-lapse analysis reveals that podoplanin enhances cell survival and colony formation capacity of squamous cell carcinoma cells
Source: PubMed Central journal article supplement (PMC5216406; doi:10.1038/srep39971), 2017-01-06
Supplement: srep39971-s1.pdf [file srep39971-s1.pdf]

Supplementary material for the manuscript:

Title: Single cell time-lapse analysis reveals that podoplanin enhances cell survival and colony formation capacity of squamous cell carcinoma cells

Authors: Tomoyuki Miyashita, Youichi Higuchi, Motohiro Kojima, Atsushi Ochiai and Genichiro Ishii

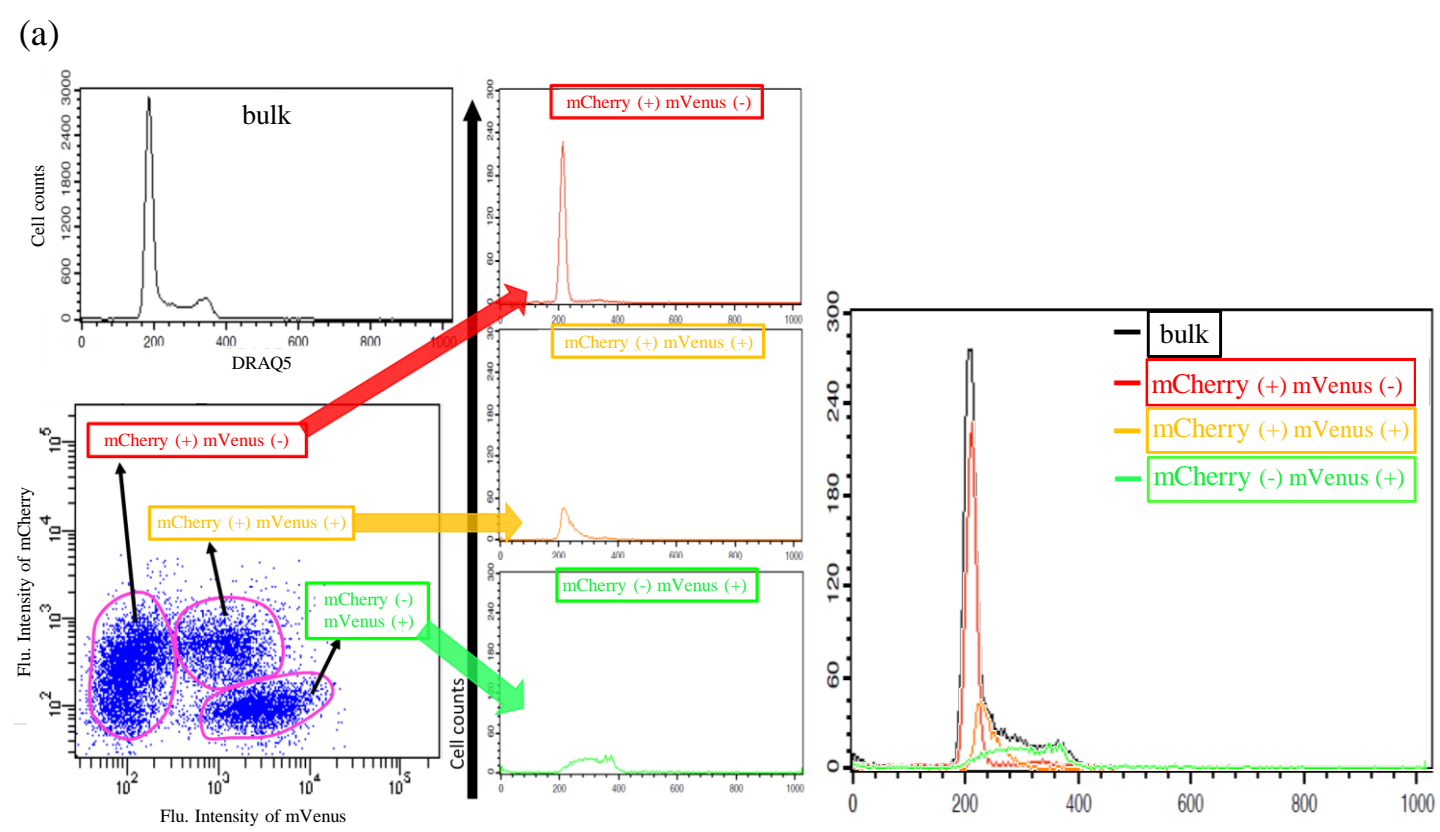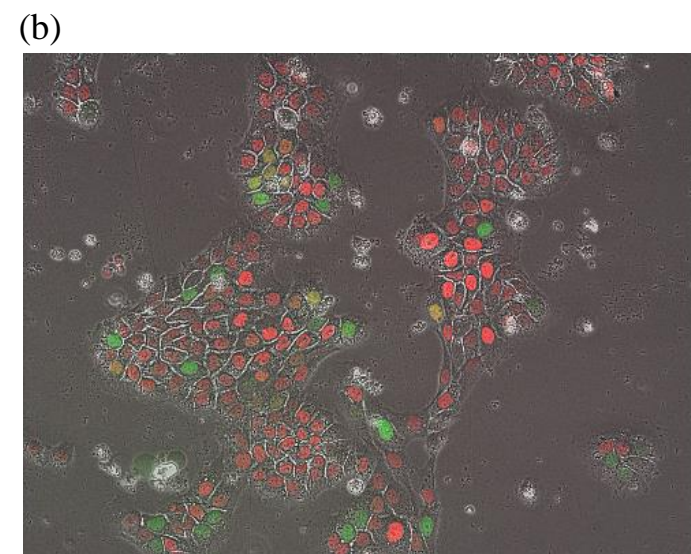

## Supplementary Figure 1

### *Generation of A431/Fucci2 cells*

(a) The cell cycle histogram. DNA contents were stained with DRAQ5 and measured. (b)

Fluorescence images of A431/Fucci2 cells. Red fluorescent cells were at the G1 phase, yellow fluorescence cells at early S phase, and green fluorescence cells at the S/G2/M phase.

(a)

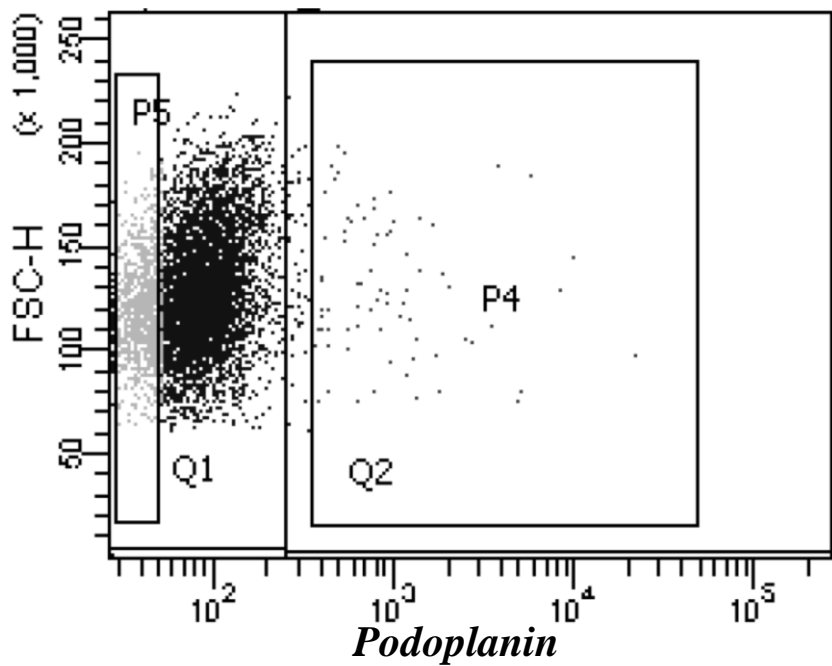

(b)

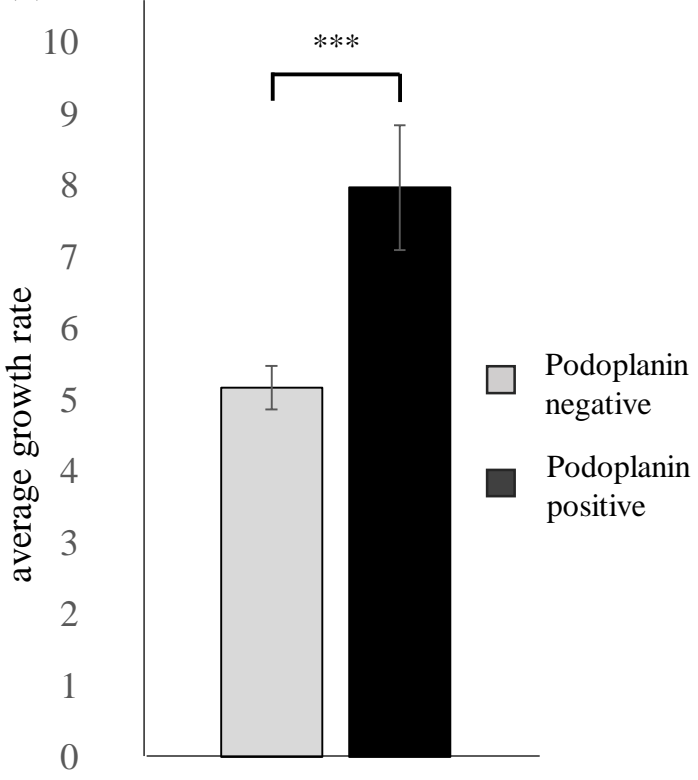

(c)

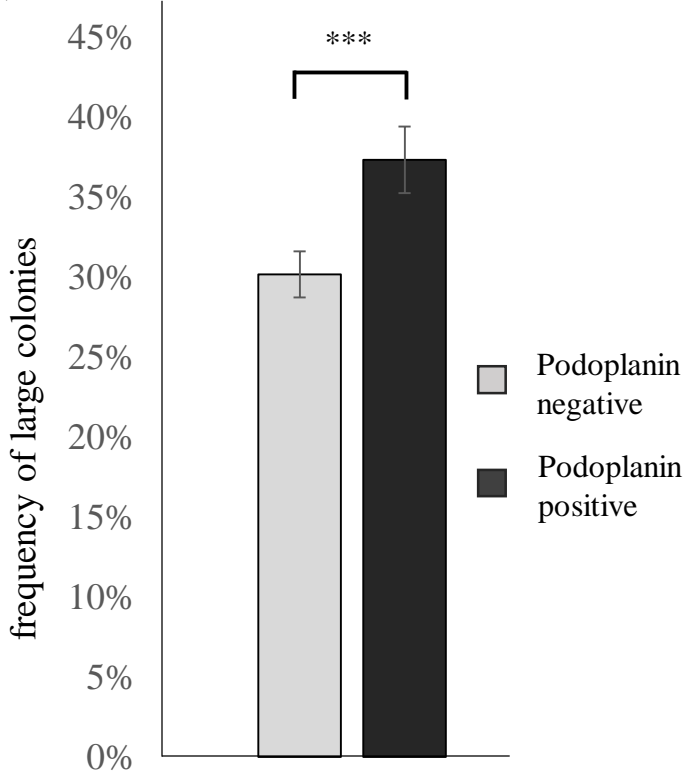

Supplementary Figure 2

*Colony forming ability of single PDPN<sup>+</sup> and PDPN<sup>-</sup> NCIH2170 cell*

(a) PDPN expression of NCIH2170 cell. PDPN positive fraction (P4) and PDPN negative fraction (P5) were sorted into 384 well plate. (b) The average growth rate of single PDPN<sup>+</sup> and PDPN<sup>-</sup> NCIH2170 cell. (c) The frequency of large colonies ( $\geq 8$  cells) derived from single PDPN<sup>+</sup> and PDPN<sup>-</sup> NCIH2170 cells. \*\*\* $p < 0.01$

(a) G<sub>1</sub> phase

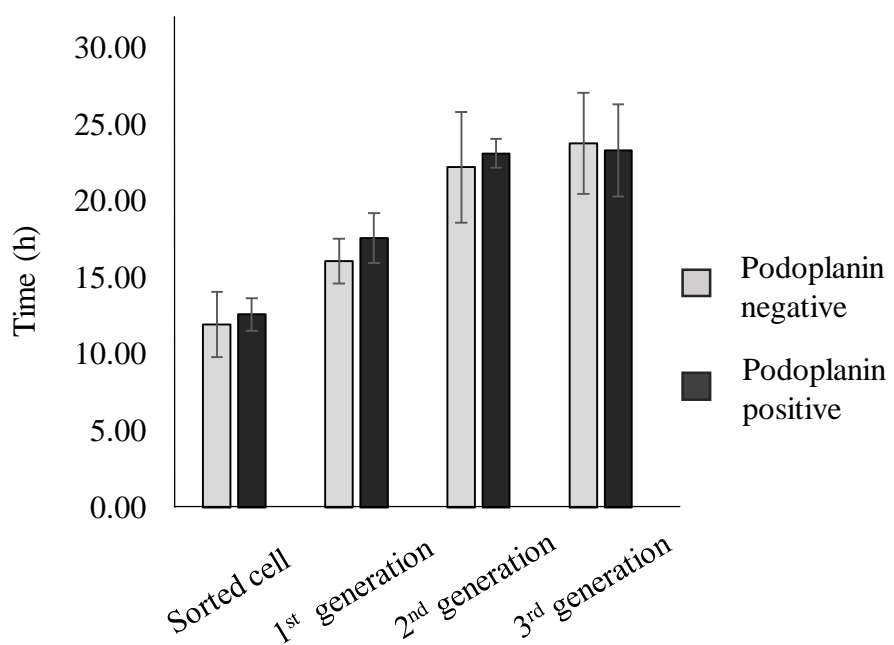

(b) S / G<sub>2</sub> / M phase

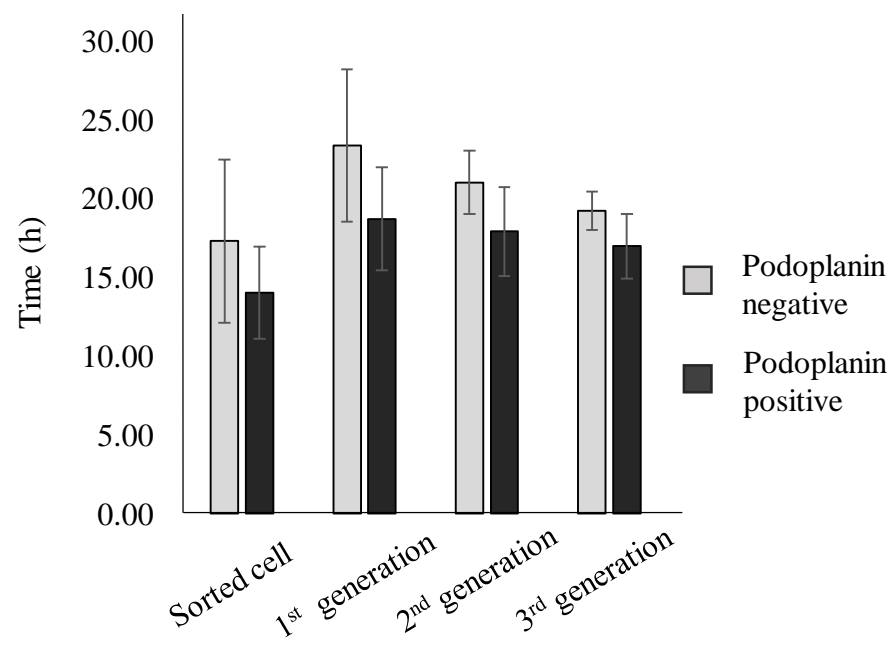

Supplementary Figure 3

*Cell cycle status of PDPN<sup>+</sup>- and PDPN<sup>-</sup>-derived cells of each generation*

(a) The G<sub>1</sub> phase duration of each generation of cells derived from PDPN<sup>+</sup> (black bar) PDPN<sup>-</sup> (gray bar) single cells. (b) The length of the S/G<sub>2</sub>/M phases of each generation.

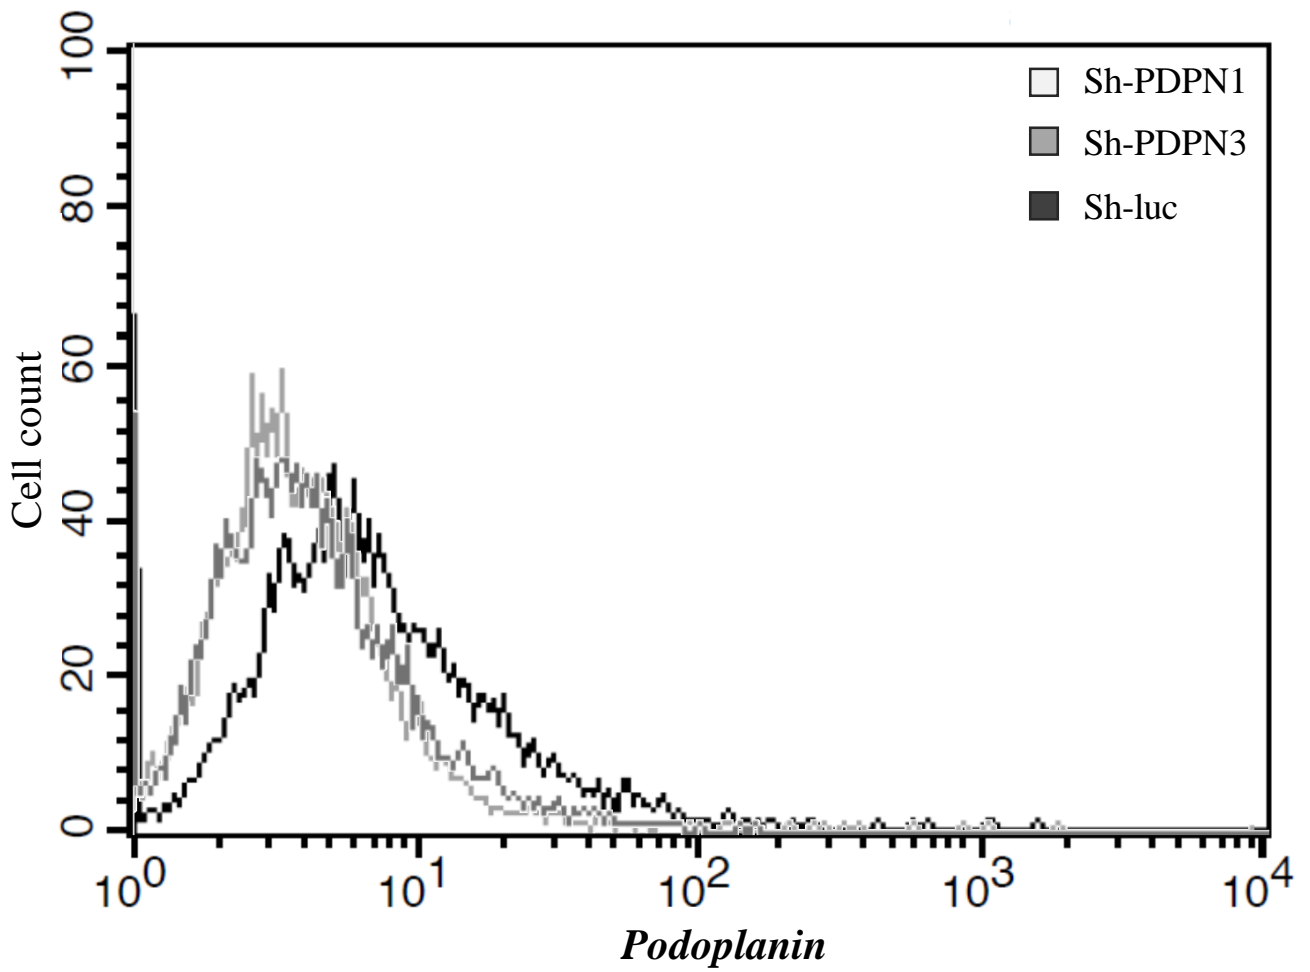

Supplementary Figure 4

*PDPN expression of shRNA transfected A431 cells*

The levels of shLuc- (controls), shPDPN1-, and shPDPN3- transfected cells are represented by the black, light gray, and dark grey lines, respectively.

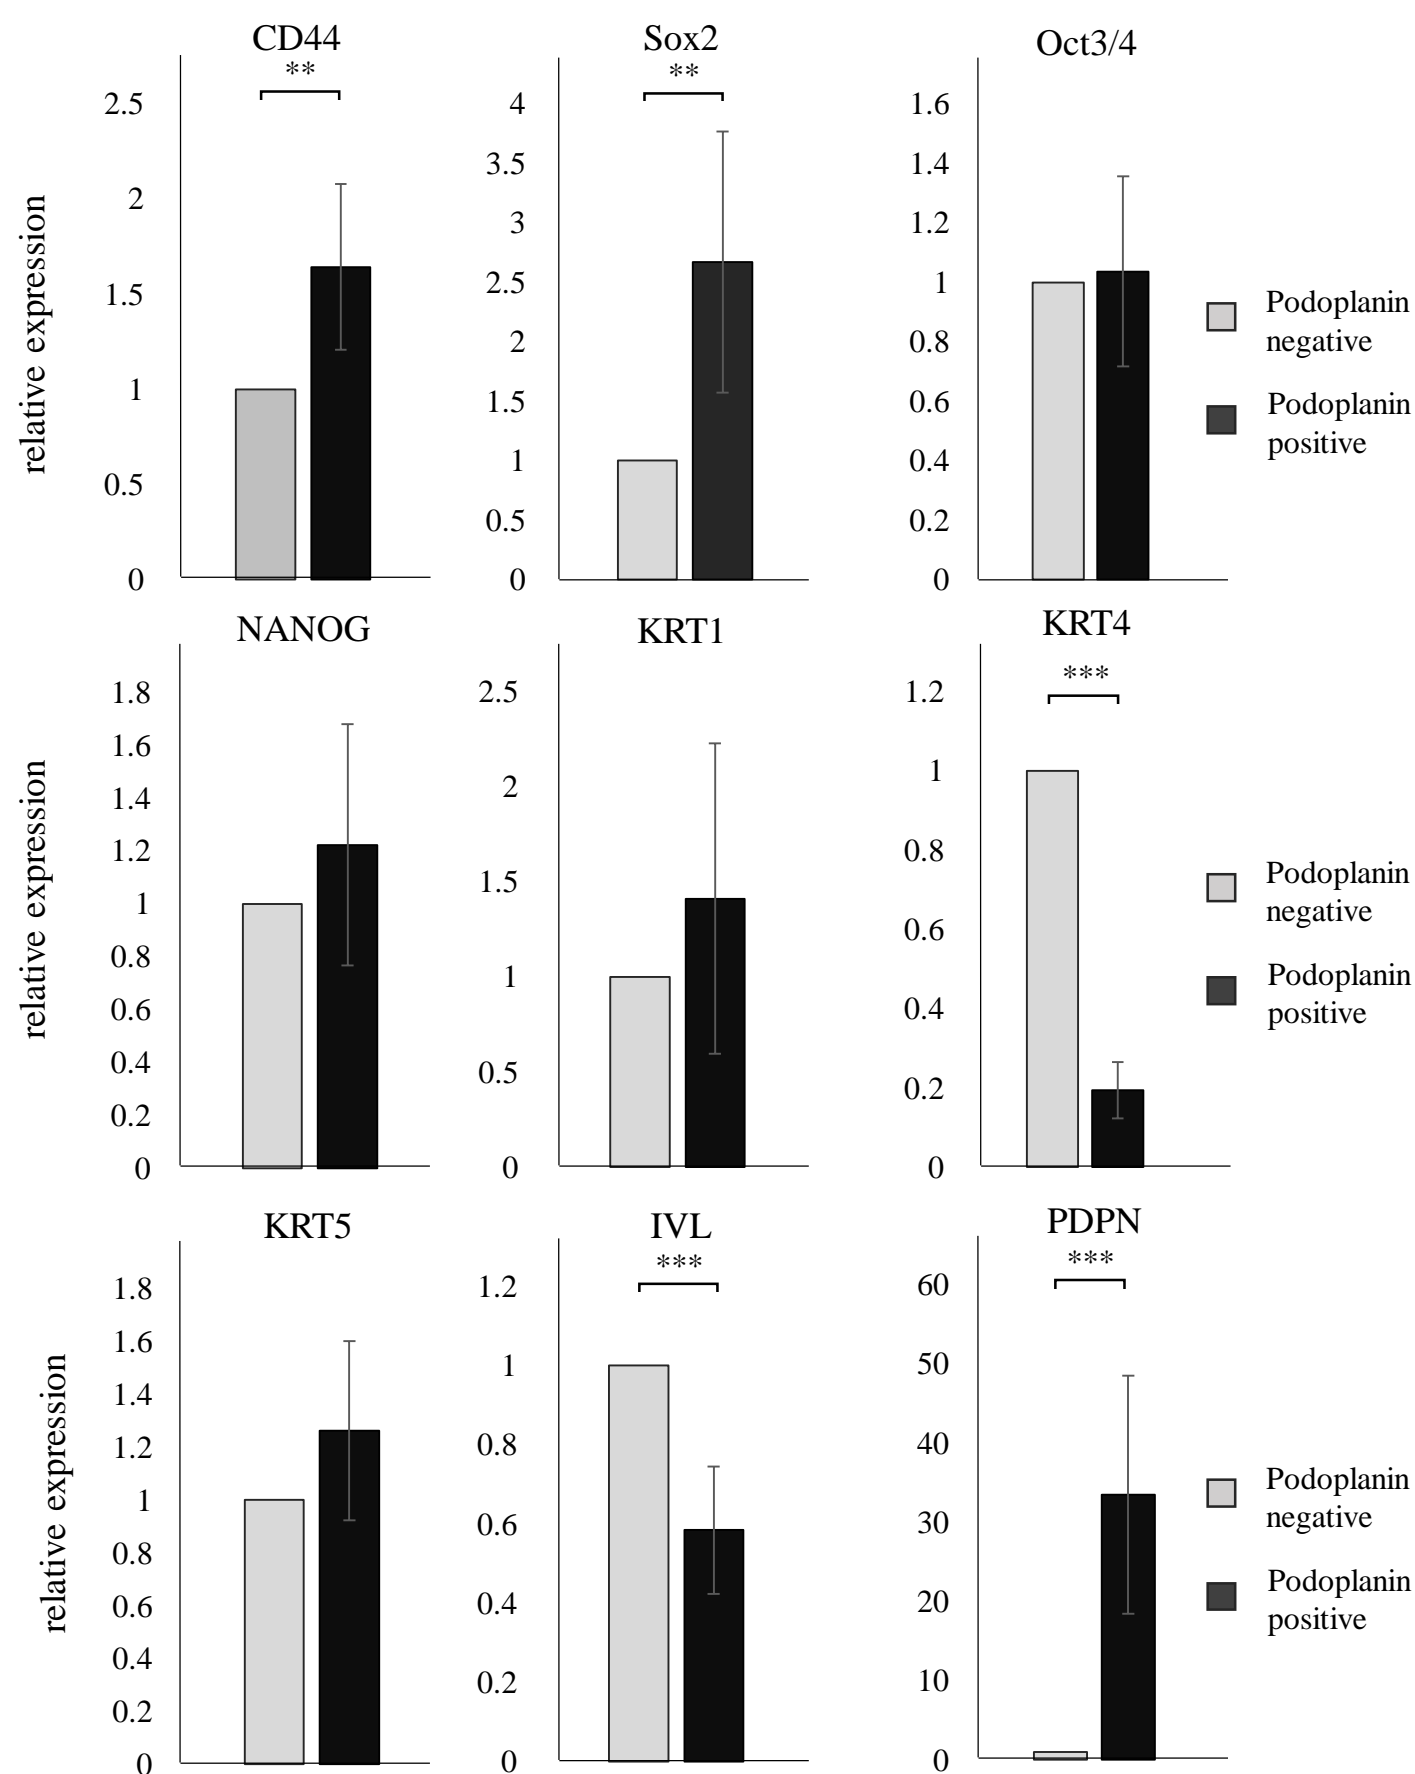

Supplementary Figure 5

Comparison of mRNA levels between PDPN<sup>+</sup> and PDPN<sup>-</sup> A431 cells

Y-axis represents relative expression ratios of PDPN<sup>+</sup> to PDPN<sup>-</sup> cells. \*\* $p < 0.05$ , \*\*\* $p < 0.01$

Sup Table. 1 The number of seeded cells and grown cells in each experiment

| <b>Experiment 1</b>     | <b>Seeded cells</b> | <b>Number of grown cells</b> |
|-------------------------|---------------------|------------------------------|
| Podoplanin <sup>-</sup> | 66                  | 75                           |
| Podoplanin <sup>+</sup> | 40                  | 155                          |
| Total                   | 106                 | 230                          |

| <b>Experiment 2</b>     | <b>Seeded cells</b> | <b>Number of grown cells</b> |
|-------------------------|---------------------|------------------------------|
| Podoplanin <sup>-</sup> | 45                  | 18                           |
| Podoplanin <sup>+</sup> | 81                  | 104                          |
| total                   | 126                 | 122                          |

| <b>Experiment 3</b>     | <b>Seeded cells</b> | <b>Number of grown cells</b> |
|-------------------------|---------------------|------------------------------|
| Podoplanin <sup>-</sup> | 42                  | 122                          |
| Podoplanin <sup>+</sup> | 48                  | 320                          |
| total                   | 90                  | 442                          |

| <b>Experiment 4</b>     | <b>Seeded cells</b> | <b>Number of grown cells</b> |
|-------------------------|---------------------|------------------------------|
| Podoplanin <sup>-</sup> | 46                  | 93                           |
| Podoplanin <sup>+</sup> | 52                  | 211                          |
| total                   | 98                  | 304                          |

| <b>Experiment 5</b>     | <b>Seeded cells</b> | <b>Number of grown cells</b> |
|-------------------------|---------------------|------------------------------|
| Podoplanin <sup>-</sup> | 54                  | 55                           |
| Podoplanin <sup>+</sup> | 51                  | 242                          |
| total                   | 105                 | 297                          |

Sup Table. 2 The number of seeded cells and grown cells in each experiment of sh-RNA transfected cell

| <b>Experiment 1</b> | <b>Seeded cells</b> | <b>Number of grown cells</b> |
|---------------------|---------------------|------------------------------|
| Sh-luc              | 29                  | 82                           |
| Sh-PDPN1            | 30                  | 21                           |
| Sh-PDPN3            | 45                  | 50                           |

| <b>Experiment 2</b> | <b>Seeded cells</b> | <b>Number of grown cells</b> |
|---------------------|---------------------|------------------------------|
| Sh-luc              | 35                  | 74                           |
| Sh-PDPN1            | 32                  | 2                            |
| Sh-PDPN3            | 32                  | 10                           |

| <b>Experiment 3</b> | <b>Seeded cells</b> | <b>Number of grown cells</b> |
|---------------------|---------------------|------------------------------|
| Sh-luc              | 53                  | 113                          |
| Sh-PDPN1            | 48                  | 22                           |
| Sh-PDPN3            | 43                  | 74                           |



Sup Table. 3 The number of seeded cells and grown cells in each experiment of ROCK inhibitor treated cells

| <b>Experiment 1</b>         | <b>Seeded cells</b> | <b>Number of grown cells</b> |
|-----------------------------|---------------------|------------------------------|
| PDPN (+) ROCK inhibitor (-) | 24                  | 118                          |
| PDPN (+) ROCK inhibitor (+) | 25                  | 91                           |
| PDPN (-) ROCK inhibitor (-) | 30                  | 65                           |
| PDPN (-) ROCK inhibitor (+) | 18                  | 40                           |

| <b>Experiment 2</b>         | <b>Seeded cells</b> | <b>Number of grown cells</b> |
|-----------------------------|---------------------|------------------------------|
| PDPN (+) ROCK inhibitor (-) | 58                  | 235                          |
| PDPN (+) ROCK inhibitor (+) | 61                  | 199                          |
| PDPN (-) ROCK inhibitor (-) | 40                  | 151                          |
| PDPN (-) ROCK inhibitor (+) | 54                  | 89                           |

| <b>Experiment 3</b>         | <b>Seeded cells</b> | <b>Number of grown cells</b> |
|-----------------------------|---------------------|------------------------------|
| PDPN (+) ROCK inhibitor (-) | 68                  | 283                          |
| PDPN (+) ROCK inhibitor (+) | 57                  | 196                          |
| PDPN (-) ROCK inhibitor (-) | 41                  | 95                           |
| PDPN (-) ROCK inhibitor (+) | 65                  | 73                           |

Sup Table. 4 Primer information for qRT-PCR.

|        | <b>Forward primer</b>           | <b>Reverse primer</b>           |
|--------|---------------------------------|---------------------------------|
| CD44   | 5'-CTCCGGACACCATGGACAA-3'       | 5'-CCACGTGGAATACACCTGCAA-3'     |
| POU5F1 | 5'-GCTGGATGTCAGGGCTCTTTG-3'     | 5'-TTCAAGAGATTTATCGAGCACCTTC-3' |
| SOX2   | 5'-CTCCGGACACCATGGACAA-3'       | 5'-CCACGTGGAATACACCTGCAA-3'     |
| NANOG  | 5'-CCTGTGATTTGTGGGCCTGA-3'      | 5'-CTCTGCAGAAGTGGGTTGTTT-3'     |
| IVL    | 5'-TTCTAAGATGTCCCAGCAACACAC-3'  | 5'-GTTTCATTGCTCCTGATGGGTA-3'    |
| KRT1   | 5'-GGGAGCAAATCAAGTCACTCAAC-3'   | 5'-TCTGCTGCTCCAGGAACCTC-3'      |
| KRT4   | 5'-CCATCAACCAGAGCTTGCTCAC-3'    | 5'-TCCATTTGGTCTCCAGGACCTTA-3'   |
| KRT5   | 5'-CCCTCAACAATAAGTTTGCCTCCT-3'  | 5'-AGAACCTTGTTCTGCTGCTCCA-3'    |
| PDPN   | 5'-GAAGACCGCTATAAGTCTGGCTTGA-3' | 5'-ACTTTGTTCTTGCGCGTGGA-3'      |
| GAPDH  | 5'-GCACCGTCAAGGCTGAGAAC-3'      | 5'-TGGTGAAGACGCCAGTGGA-3'       |
